# Supplementary material for: Microfluidic synthesis and accurate immobilization of low-density QD-encoded magnetic microbeads for multiplex immunoassay
Source: Royal Society of Chemistry journal article supplement (doi:10.1039/d4tb01585a), 2024-01-01
Supplement: d4tb01585a1.pdf [file d4tb01585a1.pdf]

## Supplementary Materials

### **Microfluidic synthesis and accurate immobilization of low-density QDs encoded magnetic microbeads for multiplex immunoassay**

Zhou Sha <sup>a</sup>, Tianyi Ling <sup>a</sup>, Wenqi Yang <sup>a</sup>, Haosu Xie <sup>a</sup>, Chunnan Wang <sup>a</sup>, Shuqing Sun

<sup>a</sup>, \*

<sup>a</sup> Institute of Biopharmaceutical and Healthcare Engineering, Shenzhen International  
Graduate School, Tsinghua University, Shenzhen 518055, China

\* Prof. Shuqing Sun: Institute of Biopharmaceutical and Healthcare Engineering,  
Shenzhen International Graduate School, Tsinghua University, Shenzhen 518055,  
China

Email: [sun.shuqing@sz.tsinghua.edu.cn](mailto:sun.shuqing@sz.tsinghua.edu.cn)

Tel: +86-(0)755-2603 6026

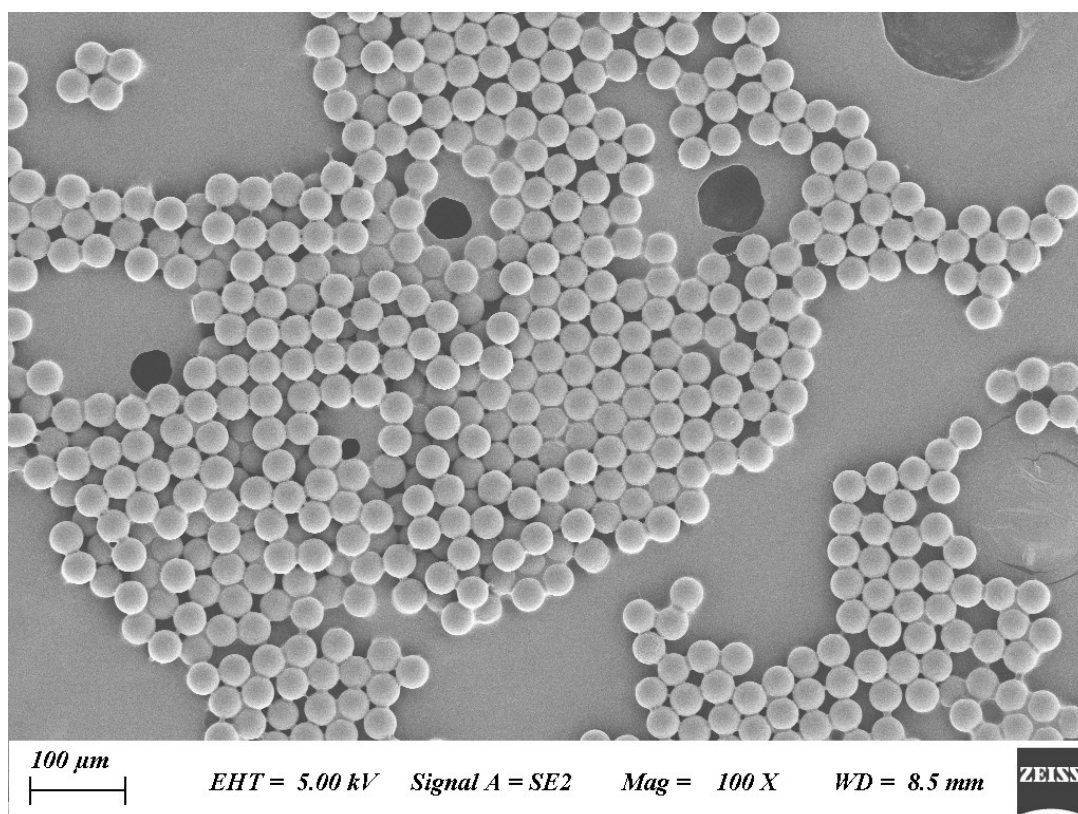

Figure S1a. SEM image of QDs encoded magnetic microbeads

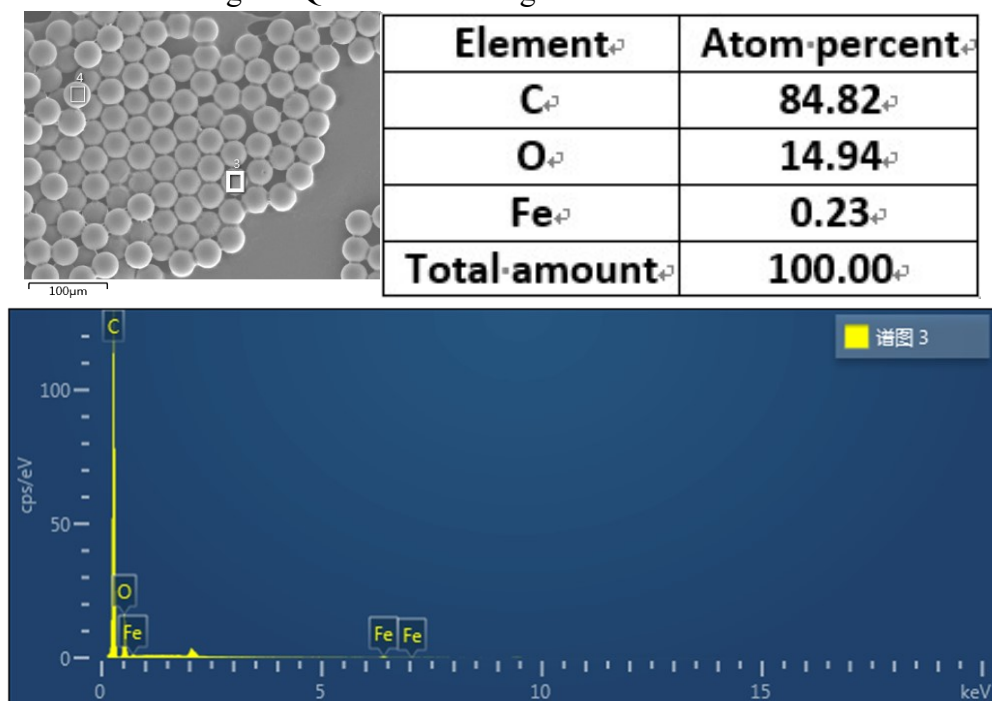

Figure S1b. EDX mapping of QDs encoded magnetic microbeads

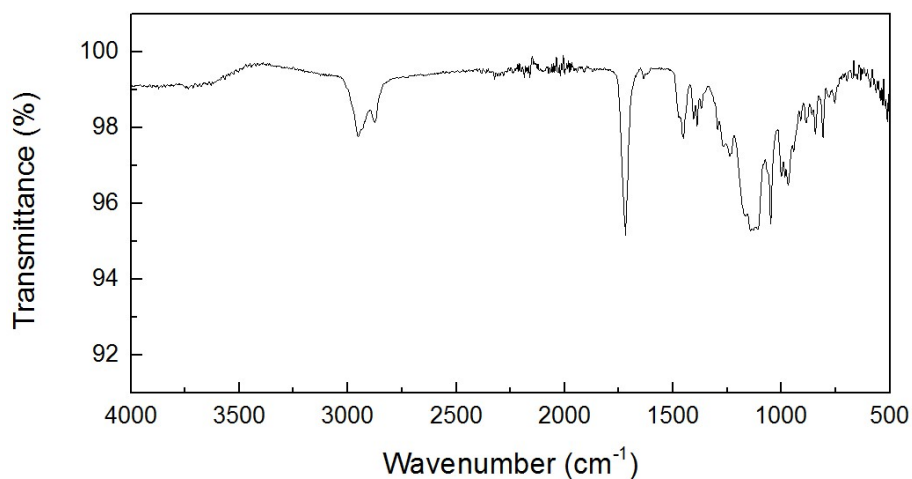

Figure S2a. Fourier transform infrared (FTIR) spectroscopy of IBOMA and ETPTA copolymer.

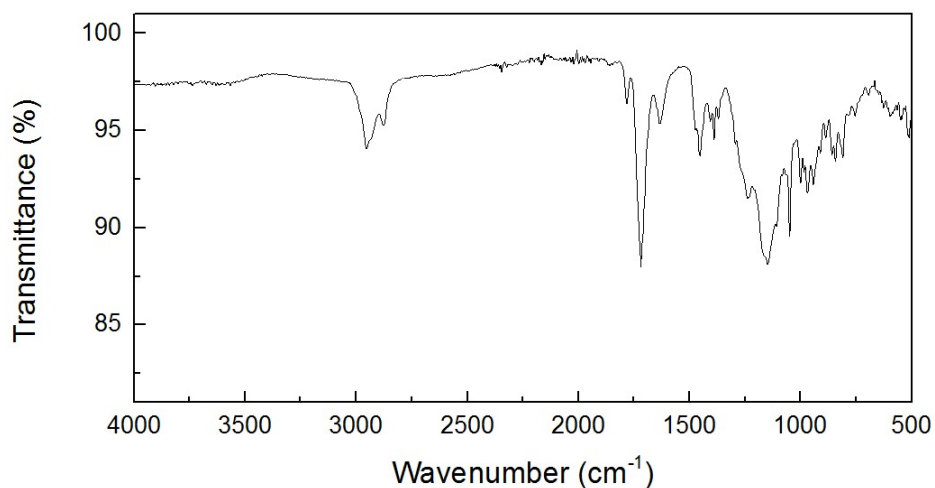

Figure S2b. Fourier transform infrared (FTIR) spectroscopy of IBOMA, ETPTA and MA copolymer before the hydrolysis of anhydride groups.

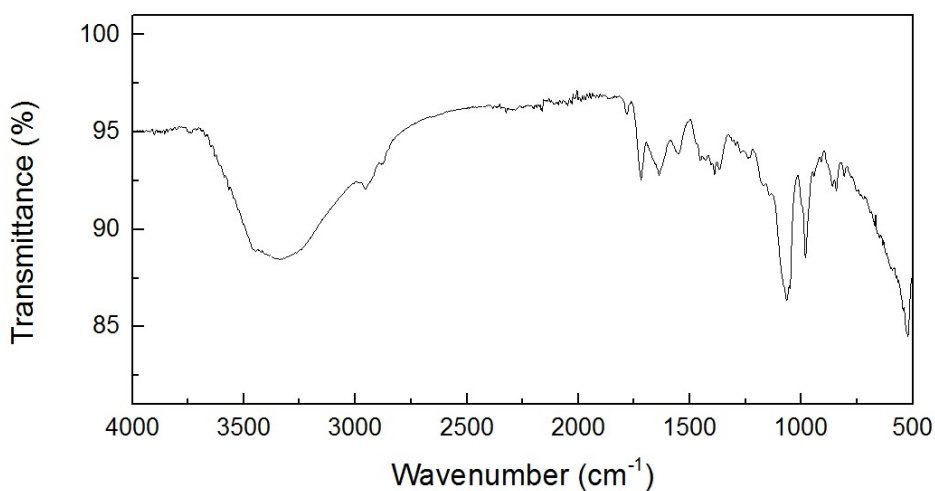

Figure S2c. Fourier transform infrared (FTIR) spectroscopy of IBOMA, ETPTA and MA copolymer after the hydrolysis of anhydride groups.

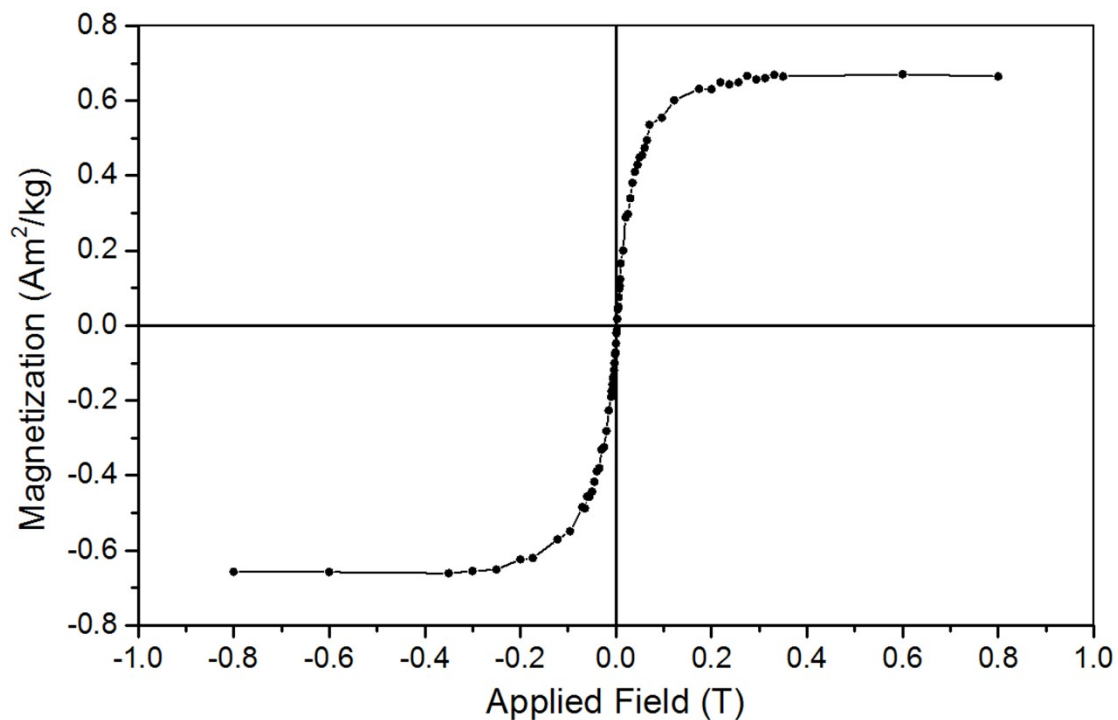

Figure S3. Magnetization curve ( $T = 300\text{ K}$ ) of dried microbeads prepared in this work.

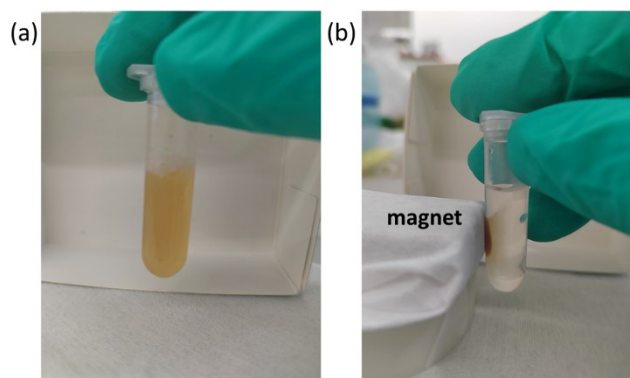

Figure S4. Performance of magnetism. (a) Microbeads were dispersed in the solution. (b) Microbeads aggregated under magnetic force.

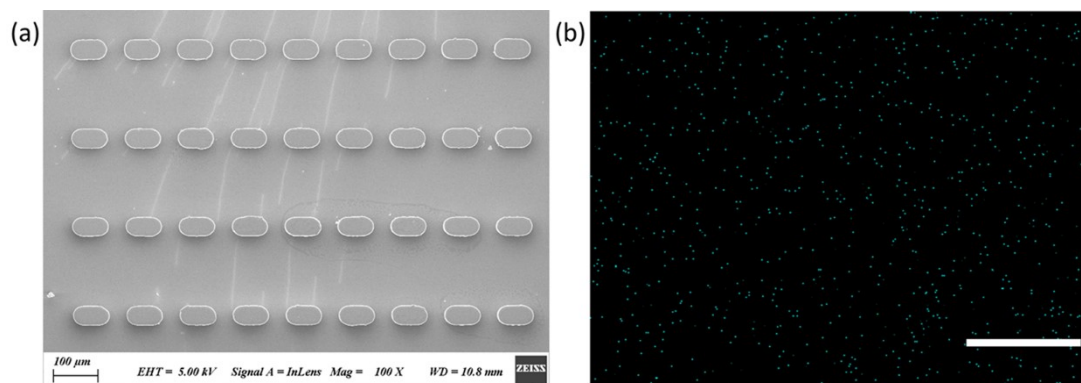

Figure S5. (a) SEM image of patterns without filling nickel powder. (b) EDS analysis of Nickel elements (blue points) in Fig S5a. The scale bar was  $250\text{ }\mu\text{m}$ .

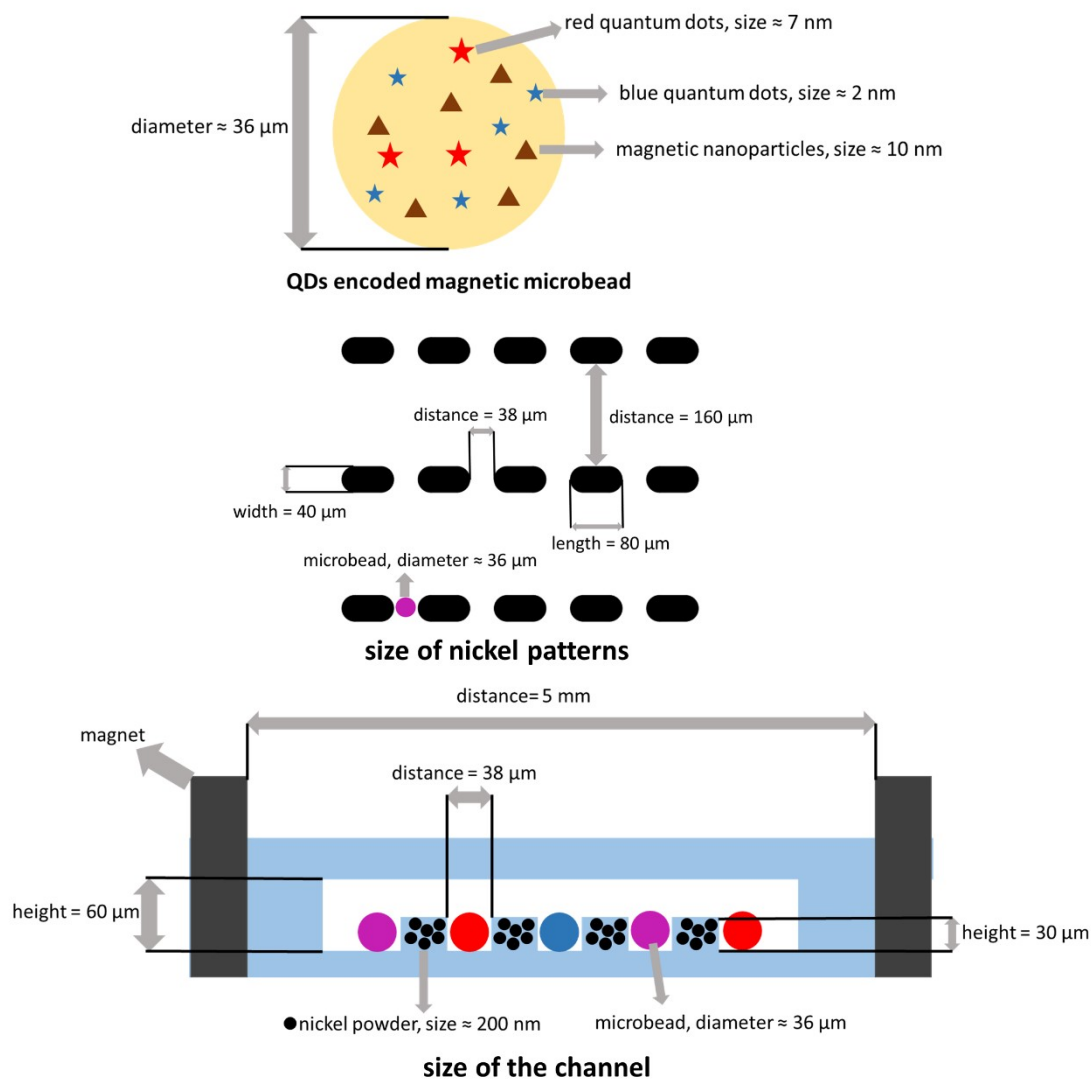

Figure S6. Sizes of microbeads, nickel patterns and the channel.

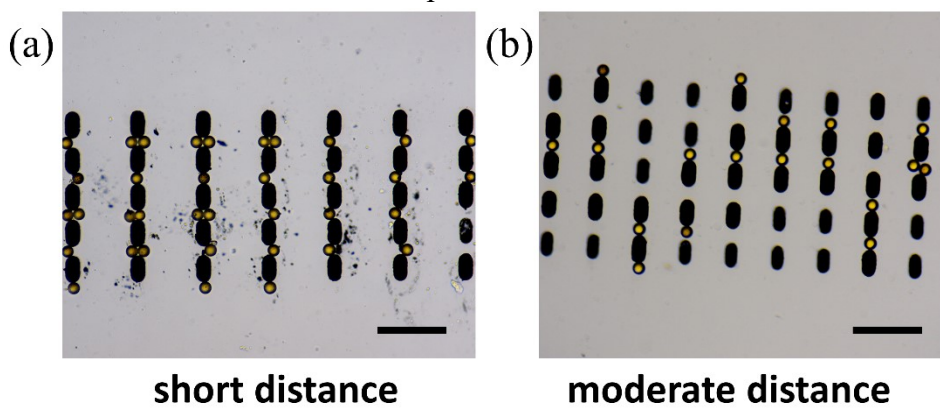

Figure S7. Influence of distance between nickel patterns on the trapping rate of microbeads. Distance in (a) was about  $30 \mu\text{m}$ , distance in (b) was about  $35 \mu\text{m}$ .

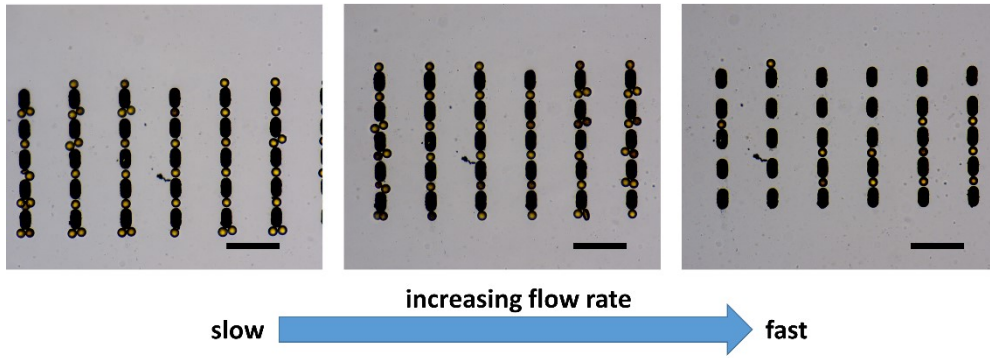

Figure S8. Influence of flow rate on the trapping rate of microbeads.

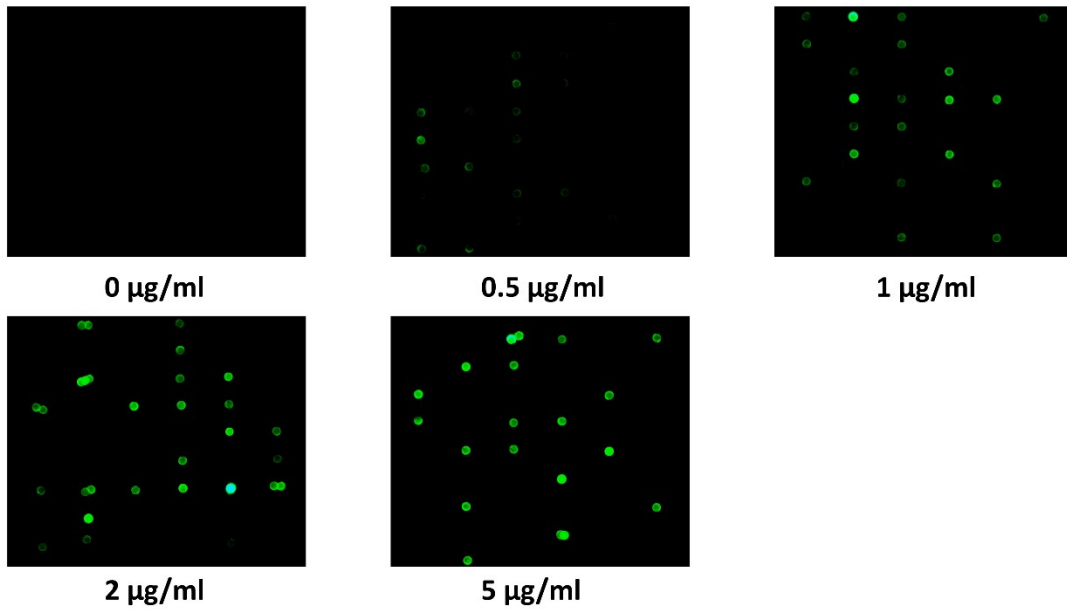

Figure S9. Fluorescence images of microbeads detecting different concentrations of anti-human IgG.
